# Supplementary material
Source: PubMed Central journal article supplement (PMC4120736)
Supplement: NIHMS608566-supplement-Online_only_Tables.pdf [file NIHMS608566-supplement-Online_only_Tables.pdf]

eTable 1. Demographic, clinical and genetic characteristics of study population.

| Variable                                | Cases       | Controls    |
|-----------------------------------------|-------------|-------------|
| Number                                  | 1169        | 707         |
| Age of Exam (AOE+SD*)                   | 77.3 + 7.90 | 70.2 + 7.98 |
| Race, % Caucasian                       | 100%        | 100%        |
| Gender (% Female)                       | 64.1%       | 35.9%       |
| rs1061170, Y402H freq risk allele C % ) | 57%         | 39%         |

\*SD = standard deviation.

eTable 2. Association of *ARMS2* haplotypes with AMD.

| Haplotype | Case MAF* | Control MAF | Age/sex-adjusted Odds Ratio | P-value               |
|-----------|-----------|-------------|-----------------------------|-----------------------|
| R-R-A     | 0.37      | 0.46        | 0.63                        | $3.6 \times 10^{-6}$  |
| H-R-A     | 0.09      | 0.13        | 0.62                        | 0.0018                |
| R-X-A     | 0.12      | 0.16        | 0.80                        | 0.10                  |
| R-R-S     | 0.41      | 0.24        | 2.3                         | $2.2 \times 10^{-14}$ |

\*MAF=minor allele frequency.
